# Supplementary material for: Decidability of Fully Quantum Nonlocal Games with Noisy Maximally Entangled States
Source: Research Square preprint supplement (doi:10.21203/rs.3.rs-4802933/v1), 2024-08-22
Supplement: Supplementary file 1 [file e8bacf714dc33e50a40a992e.docx]

----------------------- REVIEW 1 ---------------------
SUBMISSION: 206
TITLE: Decidability of fully quantum nonlocal games with noisy maximally entangled states
AUTHORS: Qin Minglong and Penghui Yao

----------- Overall evaluation -----------
SCORE: 2 (Typical ICALP paper)
----- TEXT:
The work [JNV+20] showed that computing the quantum tensor product value of nonlocal games is RE-hard. This is done by reducing the halting problem to an instance of a nonlocal game where if the Turing machine halts, then the nonlocal game has quantum value 1, and otherwise the nonlocal game has quantum value no more than 1/2. The completeness case is, in fact, witnessed by a synchronous strategy, and so computing the synchronous value of nonlocal games is also RE-hard. Synchronous strategies are characterized by strategies with consistent projective operators together with the maximally entangled state. This motivates the current paper in consideration. The authors show that computing the quantum value of fully nonlocal games when restricted to noisy maximally entangled states (MES) with maximal correlation 1-\epsilon (which includes the \epsilon-depolarized MES) is decidable.

To obtain this result, the authors show that quantum channels on a fixed number of copies of noisy maximally entangled states can approximate quantum channels on an unbounded number of noisy maximally entangled states.

The construction proceeds at a high level as follows:
- The conditions of a quantum channel can be expressed in terms of properties on its Choi representation, and the action of the channel can be recovered by taking partial traces. The authors consider the Fourier decomposition of the Choi representation.
- The authors apply "smoothing" to obtain a bounded degree approximation of the Choi representation. One can then show that the number of subsystems having high influence is bounded.
- Using a quantum version of the invariance principle, the low influence subsystems can be replaced by Gaussian random variables.
- The number of Gaussian variables can then be reduced by some Johnson-Lindenstrauss type argument via random projections.
- The operator on a bounded size subsystem now needs to be rounded back to the Choi representation of a quantum channel.

Each step in the approximation does not alter the operator acting on the noisy maximally entangled states by much.

Strengths: from what I know, this seems to be the first time that nonlocal games with quantum questions and answers have been studied in its own right. The only other paper I know that considers such objects is [LTW08]. The authors develop a quantum invariance principle. Fourier analysis of boolean functions has found a lot of application in classical complexity theory and so one may hope that quantum analogues could be just as impactful.

Weaknesses: In a previous paper [QY21] it was shown that computing the quantum value of nonlocal games with noisy maximally entangled states is decidable. It is slightly unclear to me what additional application this more general result provides. Nonlocal games have wide interest within CS and physics but I am not aware of applications for fully nonlocal games.

Response: The fully quantum nonlocal games inherently represent the class of two-prover one-round quantum interactive proof systems QMIP(2,1), in which both the messages and the verifier computation are quantum. After QMIP=MIP^* was proven by Reichardt, Unger and Vazirani in 2012, increasing attention was devoted to proving the hardness of MIP^* until MIP^*=RE was settled. However, the proof of QMIP=MIP^* cannot be generalized to the case that the provers share noisy MES. It is also not evident that “QMIP with noisy MES”=“MIP with noisy MES”. To illustrate this, suppose we were able to further improve the upper bound of noisy MESs to a constant. Then it would imply that it is NP-complete to compute the value of a nonlocal game with noisy MESs as the classical witnesses are the descriptions of players’ strategies, which have constant dimensions. But it is QMA-hard for fully quantum nonlocal games. Consequently, the complexity class QMIP with noisy MES is still worth investigating even after QY21 proved that MIP^*(2,1) with noisy MESs is computable.

Moreover, the fully quantum nonlocal games have also been studied in various settings as described in the introduction (page 2). The framework of Fourier analysis on super-operators developed in this paper may also have applications in quantum information theory, as explained in the open problems section.

Minor comments:
- On page 2, there is a discussion of variants of nonlocal games. Perhaps it would be nice to also mention nonlocal games where the questions are classical but answers are quantum. E.g., <https://arxiv.org/pdf/1510.02083.pdf>

Response: Added.

- Page 8 under "Regularity", it should be "generalization" not "generation".

Response: Fixed.

- In the open problems section, point 4 seems too general.

Response: Refined.

- Lemma 5.13, g_G should map into n copies of the state not h.

Response: The number of copies of the state is indeed h.

----------------------- REVIEW 2 ---------------------
SUBMISSION: 206
TITLE: Decidability of fully quantum nonlocal games with noisy maximally entangled states
AUTHORS: Qin Minglong and Penghui Yao

----------- Overall evaluation -----------
SCORE: 2 (Typical ICALP paper)
----- TEXT:
In a breakthrough result Ji et al. demonstrated that MIP^* = RE. Meaning two non-communicating provers, sharing arbitrary number of EPR pairs can convince a classical verifier that a touring machine halts. As a result undecidability of the halting problem directly implies that bell-like non-local games with arbitrary number of shared EPR pairs are undecidable. Later Quin et al showed that the same does not hold if the EPR pairs are noisy, i.e. non-local games with noisy maximally entangled states are indeed decidable.

This paper studies a natural followup question: is this still the case for fully quantum games? One might note that before this work the answer to this question was not even intuitively clear. Quantum answers/questions give the verifier way more leverage, for instance, although certifying entanglement of some noisy entangled states (Werner states) is not possible in Bell scenario as shown by Barrett, Buscemi showed how one can certify entanglement of any entangled state with a semi-quantum game (quantum input and classical output). Hence, naturally one might think maybe the noisy states can be used the same way as perfect EPR pairs in the MIP*=RE proof using the extra leverage from the quantum input/outputs.

Techniques:
The main technical contribution of the paper is developing a Fourier analysis toolbox for the Choi-Belavkin representation of super-operators. I believe this toolbox by itself is a very valuable contribution and is of interest by itself. I found it hard to follow the proofs in detail due to my lack of familiarity with the techniques but I could be convinced at a highlevel that the arguments are sound. To summarize I find this paper technically sound and novel.

Editorial quality:
The editorial quality is decent. I spotted some minor typos that I will note in the questions section. Only complaint I have about the writing is that it is easy for the reader to forget why their reading about a specific step of the construction, mainly due to the fact that the authors do not repeat the highlevel ideas in the appendix so I found myself trying to remember why I was reading a specific thing. I believe the extended abstract + appendix format is to blame for this more than the writing though.

Questions and comments:
Just some questions out of curiosity.

1- One might think that having infinitely many noisy maximally entangled states one can get infinitely many more accurate ones by distilling the ones provided. I was wondering what are the implications does your result have on distillation?

Response: This is an interesting question. It is not clear if there is any immediate implication of our results on distillation because classical communication between the players is assumed to be free for the distillation protocols. However, it is intriguing to study the games when limited distillation between the players is allowed, i.e., the players can exchange bounded classical messages, to understand how the complexity varies depending on the length of the messages. A similar model has been studied by Ben-Or, Hassidim, and Pilpel arXiv: 0806.3982. Moreover, the framework developed in this paper is probably helpful in studying the regularized distillation rate, which is equivalent to the quantum channel capacity, as described in the Open Problem section.

2- Somehow this result is showcasing that having entanglement witnesses for a state does not provide us with all the functionalities that selftesting a state would. Are you aware of other results showcasing something similar?

Response: This is a very interesting perspective for interpreting the results, which we had not considered previously. We are currently unaware of any similar results and will investigate them. Thanks for the question.

Typos and editorial comments:
Page 1:
-The distribution of the questions and the predicate are known -> is known

Response: Fixed.

Page 2:
- nonlocal game with a constant precision -> with constant precision
- game with probability close to the -> with a probability
- over all -> overall

Response: Fixed.

Page 3:
- analog -> analogue

Response: Fixed.

Page 4:
For via an invariance -> via an invariance

Response: Fixed.

Page 5:
- for each pair of the inputs -> pair of inputs
- difficulty can be avoid as -> can be avoided
- with a sufficient good precision -> with sufficient

Response: Fixed.

Page 7:
- subsystems via more delicate analysis -> a more delicate analysis

Response: Fixed.

to name a few.

Overall merit:
I believe this work answers an important question about fully quantum non-local games.
The authors develop new tools and techniques which might be of independent interest.
To summarize I enjoyed reading this paper and believe it is a good fit for ICALP.


----------------------- REVIEW 3 ---------------------
SUBMISSION: 206
TITLE: Decidability of fully quantum nonlocal games with noisy maximally entangled states
AUTHORS: Qin Minglong and Penghui Yao

----------- Overall evaluation -----------
SCORE: 1 (Accept if others support it (weaker than the average ICALP paper, but still comparable to many papers that do appear))
----- TEXT:
This paper studies a variant of nonlocal games that involve two cooperating, but noncommunicating players and a referee, and everyone is quantum (whereas in traditional nonlocal games model, the referee is classical and can only send/receive classical messages) – these are called “fully quantum games”. The players are assumed to share noisy maximally entangled states (MES) as a resource at the start of the game, and can perform any measurements they like on the noisy entanglement. The main result of the paper is that approximating the maximum success probability of such players is computable. In contrast, it was shown by Ji, et al. that when the players are not restricted to sharing noisy entanglement, the maximum success probability is not computable, even approximately.

The authors prove this decidability result by generalizing the invariance theorem from classical boolean function analysis (which roughly states that low degree polynomials cannot distinguish between random boolean inputs and random gaussian inputs) to the space of “super operators” (which are operators acting on operators). This is part of a larger machinery of Fourier analysis on super operators. A previous paper developed a similar machinery for matrix spaces (to prove decidability of nonlocal games with noisy MES, where the players send classical messages), and this current paper goes a step further to handle the super operator case.

Using this Fourier analytic machinery for fully quantum games, it is shown that dimension reduction can be performed on the strategies. In other words, given a fully quantum game G, there is an a priori upper bound on the maximum number of qubits needed to achieve the highest winning probability using noisy MES.

The problem reduces to studying whether local state transformation is decidable. In this setup, Alice, Bob and referee share some input tripartite state. Alice and Bob also share many copies of a noisy MES. Their goal is to perform local operations to generate another tripartite state. The question is whether this is the case. The authors show that this is decidable, which implies the claimed statement.

Pros:
Studies a natural generalization of the nonlocal games model, which is the “fully quantum games” model. This has been studied before in the past (Regev-Vidick, Reichardt-Unger-Vazirani, etc), but much less is known about this model as compared to the standard nonlocal games model.

Develops a nice “super-operator” generalization of Fourier analysis and the invariance principle.

This appears to be mathematically interesting in its own right.

Dimension reduction techniques of any form are generally interesting and eventually prove to be useful in applications down the road.

Paper looks written carefully.


Cons:
This might be viewed as an incremental result over the original decidability result of Qin-Yao.

Overall I find the technical contributions of the superoperator Fourier analysis perhaps the most valuable part of the paper. The decidability result is also nice; it raises the question of whether a matching lower bound on the complexity be found.
